# Supplementary material
Source: PubMed Central journal article supplement (PMC3126295)
Supplement: supp_85_12_5897__5.pdf [file supp_85_12_5897__5.pdf]

Table S5. Nearest PAS to stop codon<sup>a</sup>

| ORF <sup>b</sup> | Closest PAS to stop codon <sup>c</sup> | Strand <sup>d</sup> | T5NT $\leq$ 100 nt upstream (Y/N) | 3'UTR length (nt) |
|------------------|----------------------------------------|---------------------|-----------------------------------|-------------------|
| 1                | 3441                                   | B                   | Y                                 | 200               |
| 2                | 4490                                   | B                   | Y                                 | 299               |
| 9                | 7794                                   | T                   | Y                                 | 39                |
| 10               | 7833                                   | B                   | Y                                 | 77                |
| 12               | 10219                                  | T                   | Y                                 | 94                |
| 13               | 10223                                  | B                   | Y                                 | 68                |
| 14               | 10627                                  | B                   | Y                                 | 103               |
| 16               | 12111                                  | B                   | N                                 | 101               |
| 18               | 12746                                  | B                   | Y                                 | 63                |
| 19               | 12996                                  | B                   | N                                 | 168               |
| 21               | 15622                                  | B                   | Y                                 | 94                |
| 22               | 16361                                  | B                   | Y                                 | 40                |
| 24               | 17598                                  | B                   | Y                                 | 62                |
| 26               | 19477                                  | B                   | Y                                 | 58                |
| 27               | 21089                                  | B                   | Y                                 | 54                |
| 29               | 22254                                  | B                   | Y                                 | 55                |
| 30               | 22816                                  | B                   | Y                                 | 62                |
| 31               | 24180                                  | B                   | Y                                 | 94                |
| 32               | 25017                                  | B                   | Y                                 | 54                |
| 34               | 27196                                  | B                   | N                                 | 110               |
| 36               | 28722                                  | B                   | Y                                 | 204               |
| 39               | 30299                                  | T                   | Y                                 | 18                |
| 40               | 30306                                  | B                   | Y                                 | 40                |
| 43               | 32946                                  | B                   | Y                                 | 12                |
| 44               | 33755                                  | B                   | N                                 | 194               |
| 45               | 34902                                  | B                   | Y                                 | 45                |
| 50               | 37732                                  | B                   | Y                                 | 69                |
| 51               | 38836                                  | B                   | Y                                 | 54                |
| 53               | 41909                                  | B                   | Y                                 | 58                |
| 54               | 42361                                  | B                   | Y                                 | 99                |
| 55               | 42626                                  | B                   | N                                 | 318               |
| 58               | 45223                                  | B                   | Y                                 | 217               |
| 59               | 47601                                  | B                   | N                                 | 179               |
| 60               | 48296                                  | B                   | N                                 | 112               |
| 61               | 50525                                  | T                   | N                                 | 264               |
| 65               | 53524                                  | B                   | Y                                 | 112               |
| 68               | 57307                                  | B                   | Y                                 | 39                |
| 72               | 60837                                  | B                   | Y                                 | 196               |
| 80               | 71794                                  | T                   | Y                                 | 54                |
| 82               | 73476                                  | T                   | N                                 | 85                |

|     |        |   |   |     |
|-----|--------|---|---|-----|
| 89  | 78110  | T | Y | 38  |
| 94  | 81350  | T | Y | 93  |
| 96  | 83122  | T | Y | 326 |
| 98  | 87279  | T | Y | 54  |
| 101 | 87997  | B | N | 326 |
| 103 | 92539  | T | Y | 57  |
| 106 | 96589  | T | Y | 107 |
| 109 | 98927  | T | N | 684 |
| 110 | 100954 | T | N | 322 |
| 112 | 103135 | T | Y | 37  |
| 114 | 105014 | T | Y | 356 |
| 117 | 106900 | B | Y | 432 |
| 124 | 114855 | T | Y | 197 |
| 127 | 119250 | T | Y | 401 |
| 138 | 128093 | T | Y | 403 |
| 141 | 129801 | T | Y | 264 |
| 143 | 131308 | T | Y | 110 |
| 144 | 134907 | T | N | 218 |
| 152 | 140736 | B | Y | 51  |
| 154 | 142498 | T | Y | 64  |
| 156 | 143943 | T | Y | 55  |
| 158 | 145088 | T | N | 96  |
| 159 | 145735 | T | N | 11  |
| 160 | 146726 | T | Y | 147 |
| 161 | 146955 | T | N | 98  |
| 165 | 149456 | T | Y | 49  |
| 166 | 149437 | B | Y | 68  |
| 169 | 151661 | T | Y | 66  |
| 170 | 151640 | B | Y | 53  |
| 172 | 153946 | T | Y | 77  |
| 173 | 153878 | B | Y | 39  |
| 174 | 155477 | T | Y | 88  |
| 177 | 158680 | T | Y | 7   |
| 178 | 159426 | T | Y | 111 |
| 180 | 162210 | T | Y | 77  |
| 182 | 163805 | T | Y | 78  |
| 183 | 164886 | T | Y | 106 |
| 185 | 166107 | T | N | 39  |
| 188 | 170041 | T | Y | 111 |
| 194 | 173429 | T | Y | 49  |
| 195 | 174562 | T | Y | 52  |
| 196 | 175064 | T | N | 30  |
| 198 | 175638 | B | Y | 506 |
| 199 | 179883 | T | N | 853 |

|            |        |   |   |    |
|------------|--------|---|---|----|
| <b>200</b> | 180236 | T | Y | 79 |
|------------|--------|---|---|----|

<sup>a</sup>PASs from 2 h and 2 h/CHX samples.

<sup>b</sup>VACVWR ORFs.

<sup>c</sup>From nt of highest peak in PAS cluster.

<sup>d</sup>T, top strand, B, bottom strand.
